# Supplementary material for: A computational model for a molecular chemical sensor
Source: Royal Society of Chemistry journal article supplement (doi:10.1039/d3nr05900f), 2024-01-01
Supplement: d3nr05900f1.pdf [file d3nr05900f1.pdf]

## Supplementary materials

February 5, 2024

### 1 Current of the ben-ant model with thiol

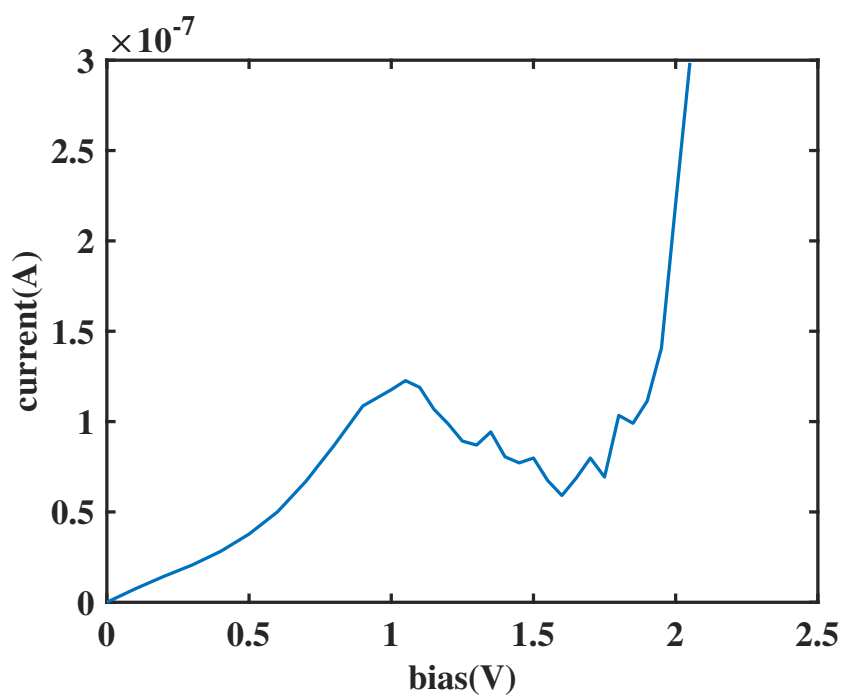

Figure 1: The I(V) figure of the ben-ant-S model

### 2 Pdos of the ben-ben models with additional functional groups

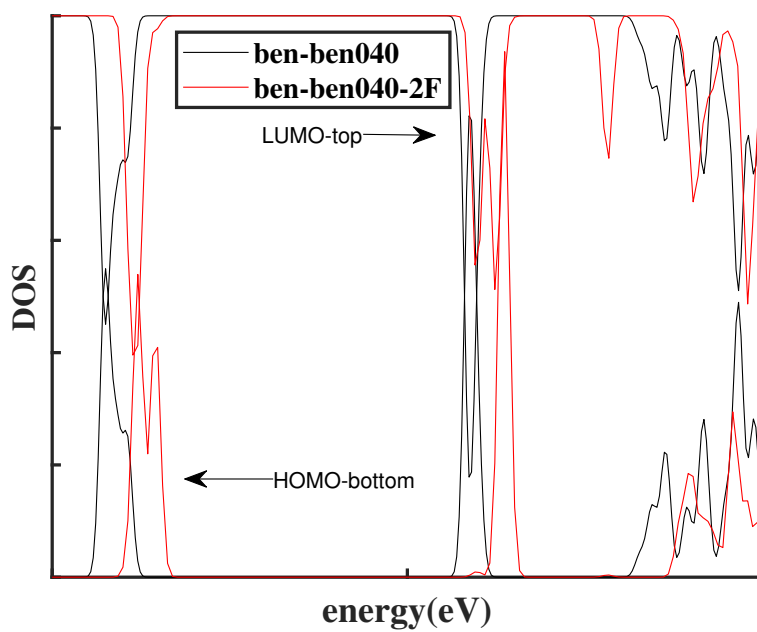

Figure 2: The pdos figure of modified ben-ben040. Black: original ben-ben040  
 Red: ben-ben040-2F. We have aligned the vacuum level energy of these two molecules. The orbitals that we determine the  $HOMO_{bottom}-LUMO_{top}$  gap are labelled as HOMO-bottom and LUMO-top

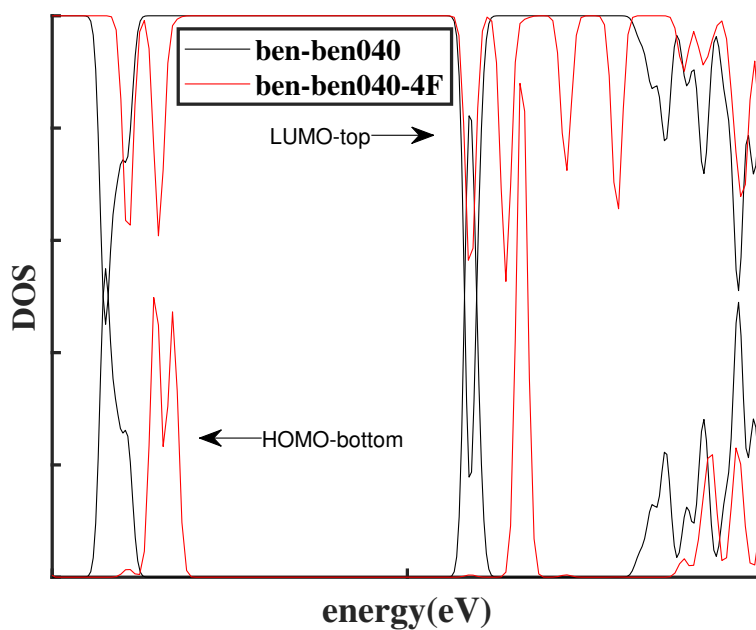

Figure 3: The pdos figure of modified ben-ben040. Black: original ben-ben040  
 Red: ben-ben040-4F. We have aligned the vacuum level energy of these two molecules. The orbitals that we determine the  $HOMO_{bottom}-LUMO_{top}$  gap are labelled as HOMO-bottom and LUMO-top

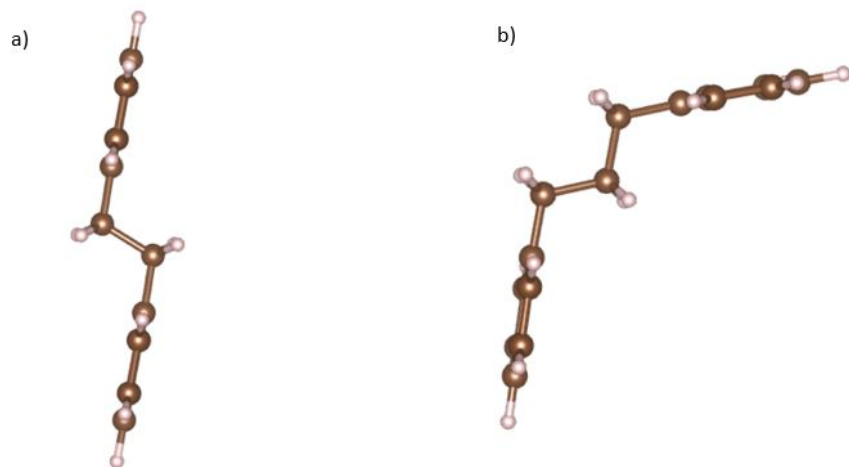

Figure 4: The geometry of a) ben-ben020 b)ben-ben030 the geometries of the models with an even number of CH<sub>2</sub> groups are different to those with an odd number of CH<sub>2</sub> groups. Different geometries affect electron transport, therefore we would not expect a linear relation between reduction of current and chain length.

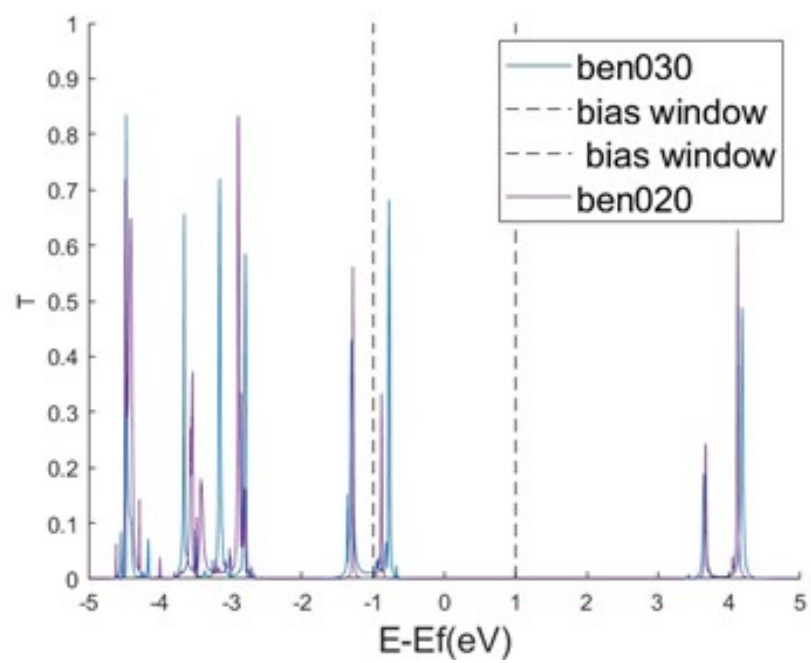

Figure 5: The transmission plot of ben-ben020 and ben-ben030. Within the bias window the transmission peak for the ben-ben030 molecule is larger than that of ben-ben020. The larger transmission peak in ben-ben030 correlates with greater electron flow at the same bias, resulting in a higher current.
